# Supplementary material
Source: publisher figshare collection journal article supplement (https://tandf.figshare.com/ndownloader/files/14256938)
Supplement: Supplementary file 1 [file 14256938]

**Table 1**. Line positions, assignments, and fit residuals for the B2-–X2P3/2 transition of the 0–0 band of gold monoxide from fitting Scheme B (in cm-1)

| J'' | pP1 | o-c | qQ1 | o-c | rR1 | o-c | qP21 | o-c | rQ21 | o-c | sR21 | o-c |
| --- | --- | --- | --- | --- | --- | --- | --- | --- | --- | --- | --- | --- |
| 1.5 | 16449.53 | -0.06 |  |  | 16452.78 | 0.01 | 16448.77 | -0.03 | 16449.37 | 0.07 | 16450.40 | 0.00 |
| 2.5 | 16449.24 | 0.02 | 16451.21 | 0.07 | 16453.61 | -0.01 | 16447.63 | 0.01 | 16448.77 | 0.02 | 16450.40 | -0.05 |
| 3.5 | 16448.77 | -0.03 | 16451.21 | -0.08 | 16454.38 | 0.01 | 16446.43 | 0.00 | 16448.07 | -0.05 | 16450.40 | -0.03 |
| 4.5 | 16448.31 | 0.02 | 16451.40 | 0.00 | 16455.10 | 0.00 | 16445.13 | 0.00 | 16447.42 | -0.03 | 16450.40 | 0.06 |
| 5.5 | 16447.76 | 0.01 | 16451.40 | -0.04 | 16455.74 | 0.00 | 16443.77 | -0.02 | 16446.71 | 0.00 | 16450.20 | 0.00 |
| 6.5 | 16447.11 | 0.01 | 16451.40 | -0.03 | 16456.32 | 0.00 | 16442.37 | -0.02 | 16445.88 | 0.00 | 16449.99 | 0.00 |
| 7.5 | 16446.43 | -0.03 | 16451.40 | 0.06 | 16456.85 | 0.01 | 16440.87 | 0.03 | 16445.01 | -0.01 | 16449.70 | -0.02 |
| 8.5 | 16445.70 | 0.00 | 16451.21 | 0.00 | 16457.31 | 0.01 | 16439.34 | -0.04 | 16444.05 | -0.03 | 16449.37 | -0.01 |
| 9.5 | 16444.94 | 0.04 | 16451.03 | 0.02 | 16457.71 | 0.02 | 16437.75 | -0.03 | 16443.09 | 0.01 | 16449.00 | 0.02 |
| 10.5 | 16444.05 | 0.02 | 16450.73 | 0.01 | 16458.05 | 0.04 | 16436.11 | 0.00 | 16442.01 | 0.01 | 16448.48 | -0.03 |
| 11.5 | 16443.09 | 0.00 | 16450.40 | 0.02 | 16458.29 | 0.02 | 16434.38 | 0.01 | 16440.87 | -0.02 | 16447.98 | -0.02 |
| 12.5 | 16442.08 | -0.01 | 16449.99 | 0.01 | 16458.51 | 0.05 | 16432.58 | -0.02 | 16439.68 | -0.02 | 16447.42 | 0.02 |
| 13.5 | 16441.06 | 0.03 | 16449.53 | 0.01 | 16458.67 | 0.05 | 16430.73 | -0.02 | 16438.43 | -0.02 | 16446.71 | -0.04 |
| 14.5 | 16439.92 | -0.02 | 16449.00 | 0.01 | 16458.67 | -0.02 | 16428.82 | -0.01 | 16437.12 | 0.00 | 16445.99 | -0.02 |
| 15.5 | 16438.73 | 0.01 | 16448.48 | 0.08 | 16458.67 | -0.03 | 16426.85 | 0.01 | 16435.74 | -0.01 | 16445.21 | 0.00 |
| 16.5 | 16437.47 | 0.01 | 16447.76 | 0.01 | 16458.67 | 0.03 | 16424.78 | -0.02 | 16434.33 | 0.04 | 16444.38 | -0.01 |
| 17.5 | 16436.11 | -0.03 | 16447.11 | 0.07 | 16458.51 | 0.00 | 16422.68 | -0.02 | 16432.77 | -0.02 | 16443.51 | 0.02 |
| 18.5 | 16434.78 | 0.02 | 16446.29 | 0.04 | 16458.35 | 0.01 | 16420.50 | -0.02 | 16431.22 | 0.01 | 16442.48 | 0.00 |
| 19.5 | 16433.35 | 0.02 | 16445.43 | 0.03 | 16458.05 | 0.02 | 16418.28 | -0.01 | 16429.58 | 0.00 | 16441.44 | -0.03 |
| 20.5 | 16431.83 | 0.01 | 16444.50 | 0.00 | 16457.82 | -0.01 | 16415.97 | -0.02 | 16427.87 | 0.00 | 16440.37 | 0.00 |
| 21.5 | 16430.26 | 0.02 | 16443.51 | -0.02 | 16457.42 | 0.02 | 16413.62 | -0.01 | 16426.11 | 0.00 | 16439.22 | 0.02 |
| 22.5 | 16428.63 | 0.02 | 16442.48 | 0.00 | 16456.98 | -0.04 | 16411.19 | -0.01 | 16424.29 | 0.00 | 16437.98 | 0.02 |
| 23.5 | 16426.90 | -0.02 | 16441.38 | -0.01 | 16456.47 | 0.00 | 16408.73 | 0.02 | 16422.40 | 0.00 | 16436.68 | 0.00 |
| 24.5 | 16425.15 | -0.01 | 16440.21 | -0.02 | 16455.87 | -0.01 | 16406.16 | 0.01 | 16420.50 | 0.06 | 16435.32 | 0.01 |
| 25.5 | 16423.33 | 0.00 | 16439.01 | 0.01 | 16455.27 | 0.00 | 16403.53 | -0.04 | 16418.39 | -0.02 | 16433.89 | -0.02 |
| 26.5 | 16421.46 | 0.00 | 16437.75 | 0.04 | 16454.57 | 0.00 | 16400.86 | -0.01 | 16416.33 | -0.01 | 16432.43 | 0.04 |
| 27.5 | 16419.49 | -0.01 | 16436.35 | -0.01 | 16453.77 | -0.05 | 16398.12 | -0.01 | 16414.21 | 0.02 | 16430.89 | 0.03 |
| 28.5 | 16417.46 | -0.03 | 16434.96 | 0.01 | 16452.96 | 0.00 | 16395.31 | 0.00 | 16411.99 | 0.01 | 16429.27 | 0.02 |
| 29.5 | 16415.33 | 0.01 | 16433.47 | 0.00 |  |  |  |  | 16409.70 | 0.00 | 16427.61 | 0.04 |
| 30.5 | 16413.25 | -0.02 |  |  |  |  |  |  | 16407.37 | 0.00 | 16425.84 | 0.01 |
| 31.5 | 16410.98 | -0.07 |  |  |  |  |  |  | 16404.97 | 0.00 | 16424.11 | 0.09 |
| 32.5 | 16408.85 | 0.04 |  |  |  |  |  |  | 16402.55 | 0.03 | 16422.19 | 0.04 |
| 33.5 |  |  |  |  |  |  |  |  | 16400.00 | 0.02 |  |  |
